# Supplementary material for: Fully conjugated covalent organic frameworks with high conductivity as superior cathode materials for Li-ion batteries
Source: Royal Society of Chemistry journal article supplement (doi:10.1039/d4ta05466k), 2024-01-01
Supplement: d4ta05466k1.pdf [file d4ta05466k1.pdf]

## Supporting Information

# Fully conjugated covalent organic frameworks with high conductivity as superior cathode materials for Li-ion batteries

Xudong Qin, Haoran Tang\*, Haiyang Zhao, Lin Shao, Chunchen Liu, Lei Ying, and Fei Huang\*

---

X. Qin, Dr. H. Tang, H. Zhao, L. Shao, Dr. C. Liu, Prof. L. Ying, Prof. F. Huang

Institute of Polymer Optoelectronic Materials and Devices

Guangdong Basic Research Center of Excellence for Energy & Information Polymer Materials

State Key Laboratory of Luminescent Materials and Devices

South China University of Technology (SCUT)

Guangzhou, China.

[\*] E-mail:

mstanghaoran@scut.edu.cn

msfhuang@scut.edu.cn

## Table of Contents

|                                               |           |
|-----------------------------------------------|-----------|
| <b>Section A. Methods and Materials .....</b> | <b>1</b>  |
| <b>Section B. Supporting Figures .....</b>    | <b>6</b>  |
| <b>Section C. Supporting Tables .....</b>     | <b>15</b> |
| <b>Section D. Supporting References .....</b> | <b>19</b> |

## Section A. Methods and Materials.

2,2'-(2,5-dihydroxy-1,4-phenylene) diacetic acid, 1,4-benzophenone, 6-bromoisatin, bromoethyl methyl ether, and 1,3,5-tris(4,4,5,5-tetramethyl-1,3,2-dioxaborolan-2-yl) benzene were purchased from Bide Pharmatech Co. Ltd. n-butanol, acetic acid, and isopropyl alcohol were purchased from J&K Scientific Co. Ltd. Other reagents and chemicals that were not specifically identified were purchased from Energy Chemical.

Fourier transform infrared (FT-IR) spectra were recorded on an IFS 66V/S Fourier transform infrared spectrophotometer. The PXRD data were recorded on a Rigaku model RINT Ultima III diffractometer by depositing powder on a glass substrate, from  $2\theta = 2^\circ$  to  $25^\circ$  with  $0.01^\circ$  increment. UV-vis spectra were recorded on a Shimadzu UV-3600 spectrometer. High-resolution transmission electron microscopy (HR-TEM) images were obtained on a TEM JEOL 2100F with an acceleration voltage of 300 kV. X-ray photoelectron spectroscopy (XPS) analysis was conducted using the Thermo Scientific K-Alpha. Gas sorption isotherms were measured on a BELSORP-mini (MicrotracBEL, Japan, Corp.) automated volumetric sorption analyzer. The desired temperature (77 K) was controlled by a liquid nitrogen bath. The conductivity measurements were conducted on JouleYacht MRS-3RT. The conductivity  $\sigma$  was calculated based on the equation  $\sigma = IL/VWd$ , where  $I$  represents the current,  $V$  represents the voltage,  $L$  represents the voltage probe distance (3.6 mm),  $W$  represents the sample width (10 mm) and  $d$  represents the thickness of the sample.

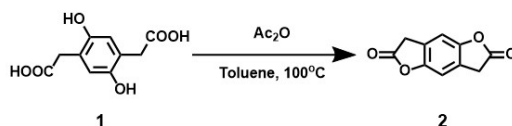

**Synthesis of 3,7-dihydrobenzo[1,2-b:4,5-b'] difuran-2,6-dione (2, H-BFDO).** H-BFDO was synthesized following previously reported procedures.<sup>1,2</sup> To a suspension of compound **1** (1.0 g, 4.4 mmol) in anhydrous toluene (50 mL), Ac<sub>2</sub>O (10 mL) was added. The mixture was stirred at 100°C for 5 h and then the solvent was removed under reduced pressure. The residue was purified by recrystallization from toluene to give **2** as a white powder (0.79 g, 80 %). <sup>1</sup>H NMR (CDCl<sub>3</sub>, 400 MHz, ppm): δ 7.07 (s, 2H), 3.78 (s, 4H).

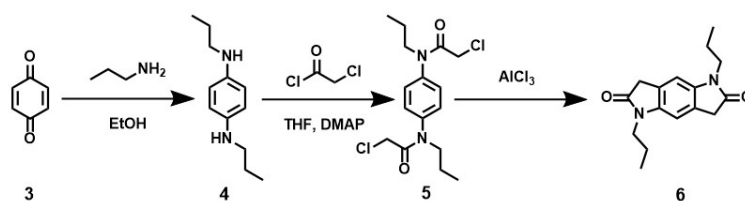

**Synthesis of N<sup>1</sup>, N<sup>4</sup>-dipropylbenzene-1,4-diamine (4).** Compound **3** (21.49 g, 191.6 mmol), n-propylamine (23.26 g, 393.5 mmol) were added to ethanol (600 mL) and reacted in air for 1 h. Evaporation of the solvent yielded the crude product, which was used directly without purification.

**Synthesis of N, N'-(1,4-phenylene) bis(2-chloro-N-propylacetamide) (5).** Compound **4** (9.0 g, 46.8 mmol), 4-dimethylaminopyridine (5.72 g, 46.82 mmol) were added to tetrahydrofuran (THF, 200 mL) in a 1000 mL round bottom flask. Then, chloroacetic chloride (15.9 g, 140.78 mmol) dissolved in 250 mL THF was added dropwise to the reaction system. The mixture was stirred for 1h at room temperature under nitrogen atmosphere. The solvent was removed under vacuum using rotary evaporation. The product was purified by silica gel column chromatography using petroleum ether/dichloromethane (PE/DCM, v/v = 1/1) as the eluent.

**Synthesis of 1,5-dipropyl-5,7-dihydropyrrolo[2,3-f] indole-2,6-dione (6, H-BPDO).** Compound **5** (1 g, 2.84 mmol), and AlCl<sub>3</sub> (2.7 g, 20.25 mmol) was added into a 50 mL single-necked reaction flask and reacted at 190°C for 40 min under nitrogen atmosphere. The reaction was then cooled to room temperature and quenched with water. The solids were filtered out as crude product, which was subsequently purified by silica gel column chromatography using DCM/PE (v/v = 10/1) to obtain a white product. Yield 500 mg (64%). <sup>1</sup>H NMR (CDCl<sub>3</sub>, 400 MHz, ppm): 6.79 (s, 2H), 3.68-3.65 (m, 4H), 3.55 (s, 4H), 1.72-1.68 (m, 4H), 0.99-0.96 (m, 6H).

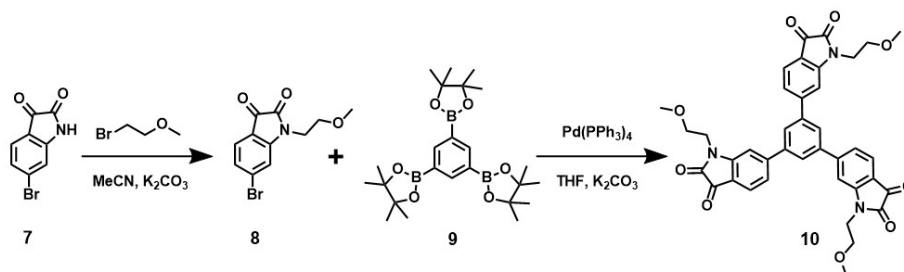

**Synthesis of 6-bromo-1-(2-methoxyethyl)-1H-indole-2,3-dione (8).** The 6-bromo-1-(2-methoxyethyl)-1H-indole-2,3-dione was synthesized by adding 6-bromoisatin (5 g, 22.33 mmol), K<sub>2</sub>CO<sub>3</sub> (4.62 g, 33.5 mmol), and MeCN (200 mL) to a 500 ml double-necked reaction flask. The mixture was heated at 80°C for half an hour, and then bromoethyl methyl ether (4.62g, 33.5 mmol) was added. After being heated for 12 hours, the reaction was cooled to room temperature and quenched with water, followed by extraction with ethyl acetate, collection of the organic phase, and drying by addition

of MgSO<sub>4</sub>. Finally, purification of the product was carried out by chromatography over the column PE/DCM (v/v = 1/1) to obtain an orange product.

**Synthesis of 6,6',6''-(benzene-1,3,5-triyl)tris(1-(2-methoxyethyl)indoline-2,3-dione) (10, TBI).** A reaction mixture containing compound **9** (2.02 g, 8.00 mmol), Pd(PPh<sub>3</sub>)<sub>4</sub> (506 mg, 0.40 mmol), compound **8** (5.16 g, 18.24 mmol), and K<sub>2</sub>CO<sub>3</sub> (5.52 g, 40 mmol) in THF (100 mL) and H<sub>2</sub>O (20 mL) was stirred under argon at 80°C for 3 days. After cooling to room temperature, the yellow precipitate was collected by filtration, washed with cyclohexane and acetone to yield the product as a bright yellow powder. Yield: 2.6 g (86%). <sup>1</sup>H NMR (CDCl<sub>3</sub>, 400 MHz, ppm): δ 7.86 (s, 3H), 7.74-7.73 (d, 3H), 7.42-7.40 (d, 3H), 7.34 (s, 3H), 4.01-3.99 (m, 6H), 3.72-3.69 (m, 6H), 3.35 (s, 9H).

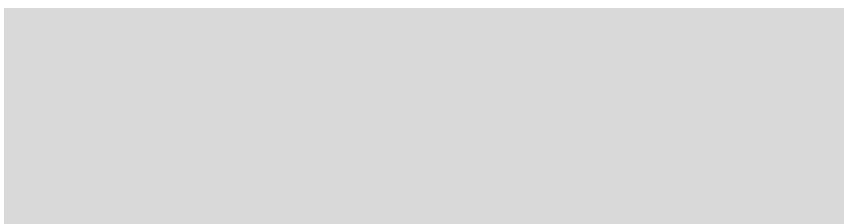

**Synthesis of 3,7-bis((E)-6-bromo-1-(2-methoxyethyl)-2-oxoindolin-3-ylidene)-3,7-dihydrobenzo[1,2-b:4,5-b']difuran-2,6-dione (11).** The H-BFDO (190.1 mg, 1.0 mmol), and compound **8** (594.3 mg, 2.1 mmol) were added in a 25ml double necked bottle with 5 mL of AcOH/n-Butanol (v/v = 1/1) as solution. Subsequently, p-toluenesulfonic acid (0.1 eq) was added as a catalyst. The mixture was subjected to a vacuum reaction at 130°C for 24 hours. The reaction was restored to room temperature. The precipitate was filtered and washed with methanol to give crude product. HR-MS (MALDI) m/z calcd. for (C<sub>32</sub>H<sub>21</sub>Br<sub>2</sub>N<sub>2</sub>O<sub>8</sub>) (M-H<sup>+</sup>): 720.97. Found: 720.66.

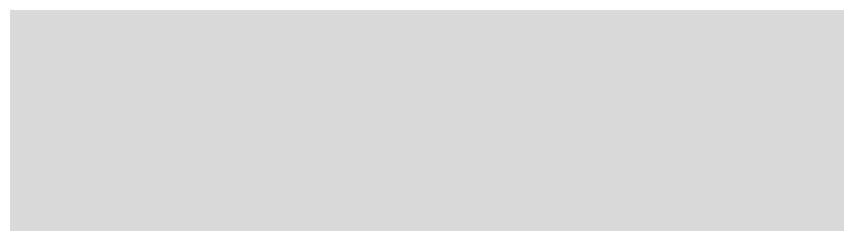

**Synthesis of 3,7-bis((E)-6-bromo-1-(2-methoxyethyl)-2-oxoindolin-3-ylidene)-1,5-dipropyl-5,7-dihydropyrrolo[2,3-f]indole-2,6(1H,3H)-dione (12).** The H-BPDO (272.2 mg, 1 mmol), and compound **8** (594.3 mg, 2.1 mmol) were added in a 25ml double necked bottle with 5 mL of AcOH/n-Butanol (v/v = 1/1) reaction solution. Subsequently, p-toluenesulfonic acid (0.1 eq) was added as a catalyst. The mixture was subjected to a vacuum reaction at 130°C for 24 hours. The reaction was restored to room temperature. The precipitate was filtered and washed with methanol to give crude product. HR-MS (MALDI) m/z calcd. for (C<sub>38</sub>H<sub>35</sub>Br<sub>2</sub>N<sub>4</sub>O<sub>2</sub>) (M-H<sup>+</sup>): 803.10. Found: 802.64.

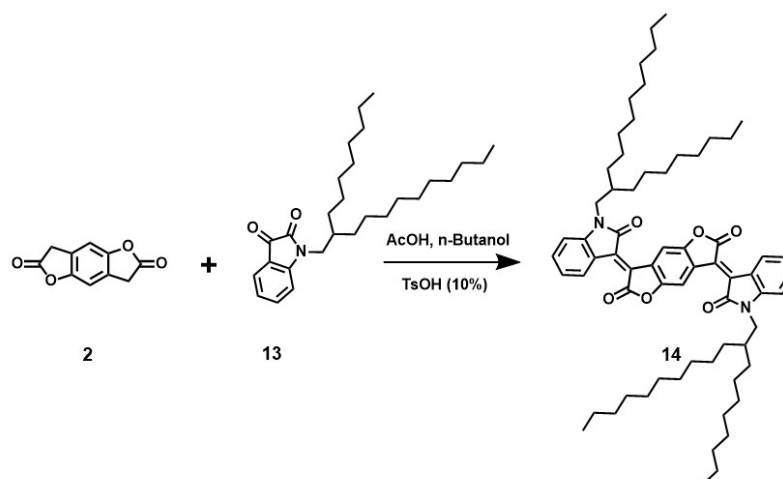

**Synthesis of 3,7-bis((E)-1-(2-hexyldecyl)-2-oxoindolin-3-ylidene)-3,7-dihydrobenzo[1,2-b:4,5-b']difuran-2,6-dione (14).**

The H-BFDO (190.1 mg, 1.0 mmol), and compound **13** (868.7 mg, 2.1 mmol) were added in a 25 mL double-necked bottle with 5 mL of AcOH/n-Butanol (v/v = 1/1) as solution. Subsequently, p-toluenesulfonic acid (0.1 eq) was added as a catalyst. The mixture was subjected to a vacuum reaction at 130°C for 24 hours. The reaction was restored to room temperature. The precipitate was filtered and washed with methanol. Yield 844.0 mg (86%). <sup>1</sup>H NMR (CDCl<sub>3</sub>, 400 MHz, ppm): δ 9.13 (s, 2H), 9.06-9.04 (m, 2H), 7.42-7.39 (m, 2H), 7.09-7.06 (m, 2H), 6.80-6.78 (d, 2H), 3.67-3.66 (d, 4H), 1.92-1.89 (m, 2H), 1.34-1.23 (m, 64H), 0.87-0.84 (m, 12H).

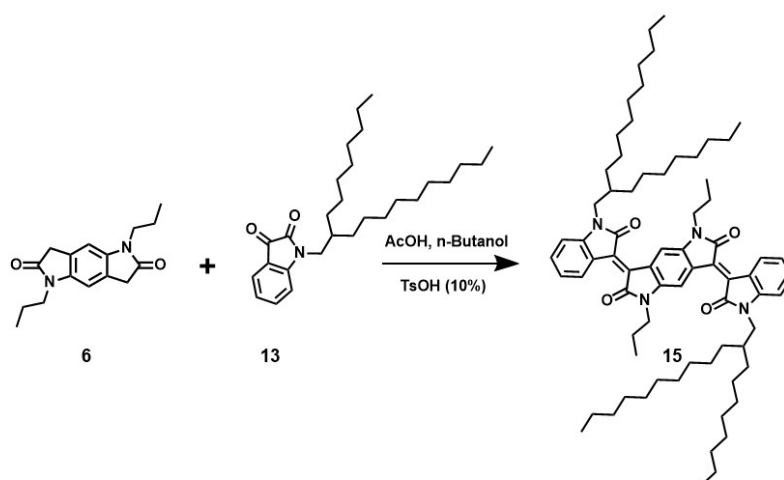

**Synthesis of 3,7-bis((E)-1-(2-hexyldecyl)-2-oxoindolin-3-ylidene)-1,5-dipropyl-5,7-dihydropyrrolo[2,3-f]indole-2,6(1H,3H)-dione (15).**

The H-BPDO (272.2 mg, 1.0 mmol), and compound **13** (868.7 mg, 2.1 mmol) were added in a 25 mL double-necked bottle with 5 mL of AcOH/n-Butanol (v/v = 1/1) as solution. Subsequently, p-toluenesulfonic acid (0.1 eq) was added as a catalyst. The mixture was subjected to a vacuum reaction at 130°C for 24 hours. The reaction was restored to room temperature. The precipitate was filtered and washed with methanol. Yield 893.4 mg (84%). <sup>1</sup>H NMR (CDCl<sub>3</sub>, 400 MHz, ppm): δ 9.23-9.21 (m, 2H), 8.87 (s, 2H), 7.36-7.33 (m, 2H), 7.06-7.02 (m, 2H), 6.77-6.75 (d, 2H), 3.85-3.83 (m, 4H), 3.68-3.66 (d, 4H), 1.89-1.81 (m, 6H), 1.27-1.23 (m, 64H), 0.87-0.86 (m, 6H), 0.85-0.84 (m, 12H).

**Synthesis of TBI-COF-O.** H-BFDO (5.7 mg, 0.03 mmol) and TBI (13.8 mg, 0.02 mmol) were added into AcOH/n-Butanol (1 mL, v/v = 1/1) solution in a 10 mL Pyrex tube. Then 4M TsOH in isopropanol was added to the solution as a catalyst. The tube was degassed by three freeze-pump-thaw cycles. After that, the tube was sealed off and heated to 120°C for 4 days. The precipitates were collected by centrifugation and then washed with THF (3 × 10 mL), acetone (3 × 10 mL), DCM (3 × 10 mL), and the powder was placed in a Soxhlet extractor and washed with chlorobenzene. Finally, the powder was collected and dried at 80°C under vacuum overnight to give **TBI-COF-O** in a yield of 87%.

**Synthesis of TBI-COF-N.** H-BPDO (8.2 mg, 0.03 mmol) and TBI (13.8 mg, 0.02 mmol) were added into AcOH/n-Butanol (1mL, v/v = 1/1) solution in a 10 mL Pyrex tube. Then 4M TsOH in isopropanol was added to the solution as a base catalyst. The tube was degassed by three freeze-pump-thaw cycles. After that, the tube was sealed off and heated to 140°C for 4 days. The precipitates were collected by centrifugation and then washed with tetrahydrofuran (3 × 10 mL), acetone (3 × 10 mL), DCM (3 × 10 mL), and the powder was placed in a Soxhlet extractor and washed with chlorobenzene. Finally, the powder was collected and dried at 80 °C under vacuum overnight to give **TBI-COF-N** in a yield of 82%.

**Computational Calculation.** The PXRD data were analyzed by Pawley refinement using Reflex, which is a commercial software package for crystallographic structural analysis implemented in MS modeling version 4.4 (Accelrys Inc.). The final  $R_{WP}$  and  $R_p$  values were calculated as 3.74% and 6.26% for **TBI-COF-O**. Meanwhile, the final  $R_{WP}$  and  $R_p$  values were calculated as 6.89% and 11.24% for **TBI-COF-N**. Unit cell dimensions were solved manually using coordinates from the obtained PXRD pattern positions. Pawley refinement was then performed, and the lattice parameters were iteratively optimized until the  $R_{WP}$  values converged.

**Computational details.** The geometry of an isolated molecule and complexes was optimized at the B3LYP-D3(BJ)/6-311+G(d, p) level using the Gaussian 09 software package.

**Electrochemical Measurements.** The electrodes were prepared by casting a mixture of **TBI-COF-O** (or **TBI-COF-N**), carbon black and polyvinylidene difluoride (PVDF) with a mass ratio of 7:2:1/8:1:1 onto a copper foil. Polyethylene membrane was used as the separator. The electrolyte was 1 M LiPF<sub>6</sub> in ethylene carbonate: dimethyl carbonate (EC/DMC, v/v = 1/1). The electrochemical performances were tested in 2032-coin cells with a 450 μm Li as the cathode. The LAND battery test system (CT2001A) was used for long-term cyclic stability and rate capability tests. An electrochemical work station (CHI760D) was used to obtain the data of cyclic voltammetry (CV) and electrochemical impedance spectroscopy (EIS). The EIS was tested within a frequency range of 0.01-100000 Hz and a voltage amplitude of 5 mV.

**Theoretical capacity calculations.** The theoretical capacities ( $C_t$ , mAh g<sup>-1</sup>) of **TBI-COF-O** and **TBI-COF-N** were calculated according to the following equation (2):

$$C_t = \frac{nF}{3.6M}$$

Where  $n$  is the number of transferred electrons during the redox reaction, and  $M$  is the molecular weight of the unit cell of **TBI-COF-O** and **TBI-COF-N**,  $F$  is the Faraday constant (96500 C mol<sup>-1</sup>).

**Pseudo capacitance calculations.** To evaluate the capacitive contribution of **TBI-COF-O**, and **TBI-COF-N** to the total current response, the diffusion-controlled and surface capacitive contributions can quantitatively be separated using the equation (3) below:

$$i = kV + bV^{\frac{1}{2}}$$

where  $v$  is the scan rate,  $i$  is the current,  $k$  and  $b$  are constants.

## Section B. Supporting Figures

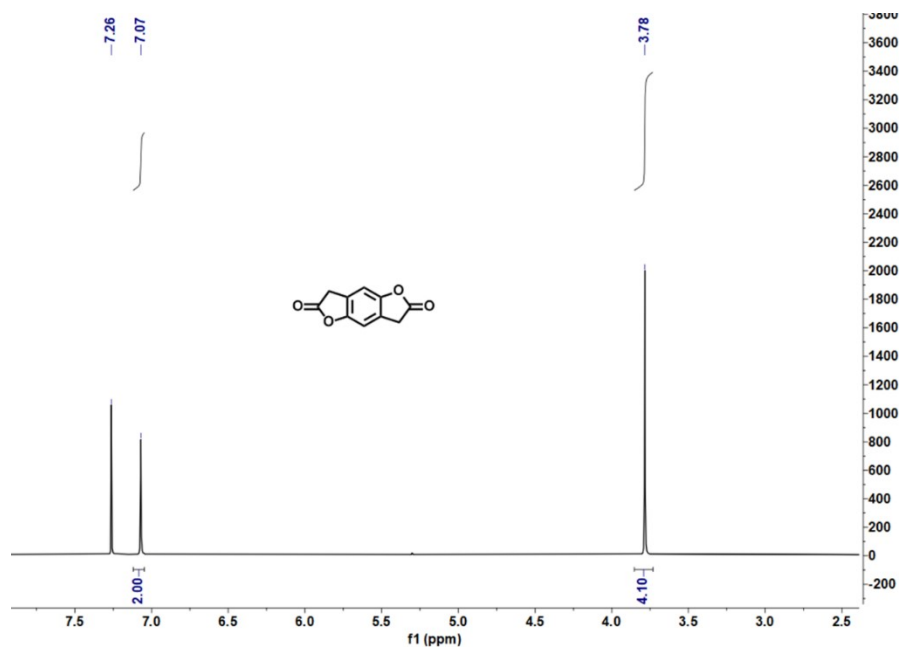

Figure S1. <sup>1</sup>H NMR spectrum of H-BFDO.

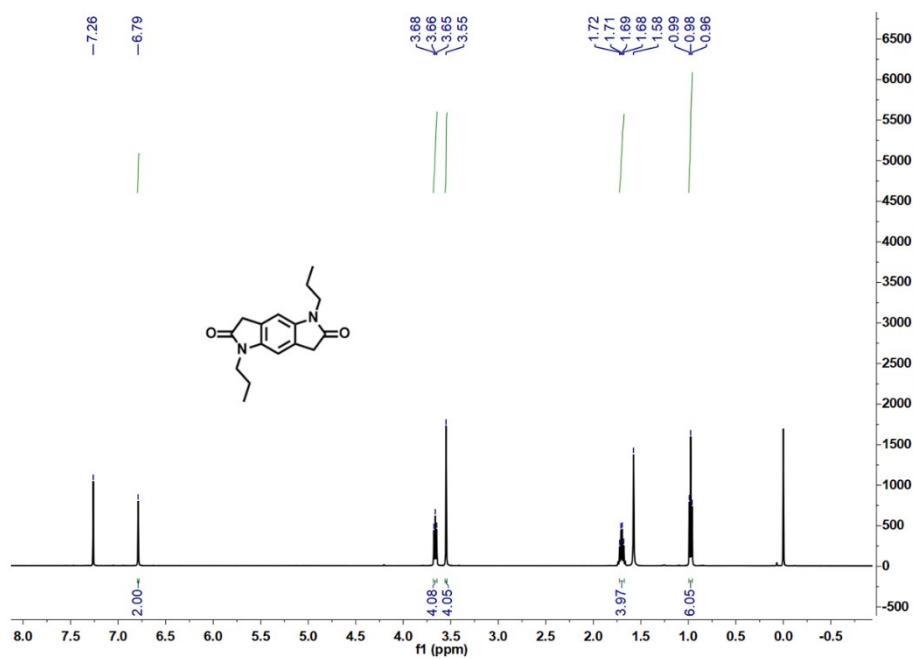

Figure S2. <sup>1</sup>H NMR spectrum of H-BPDO.



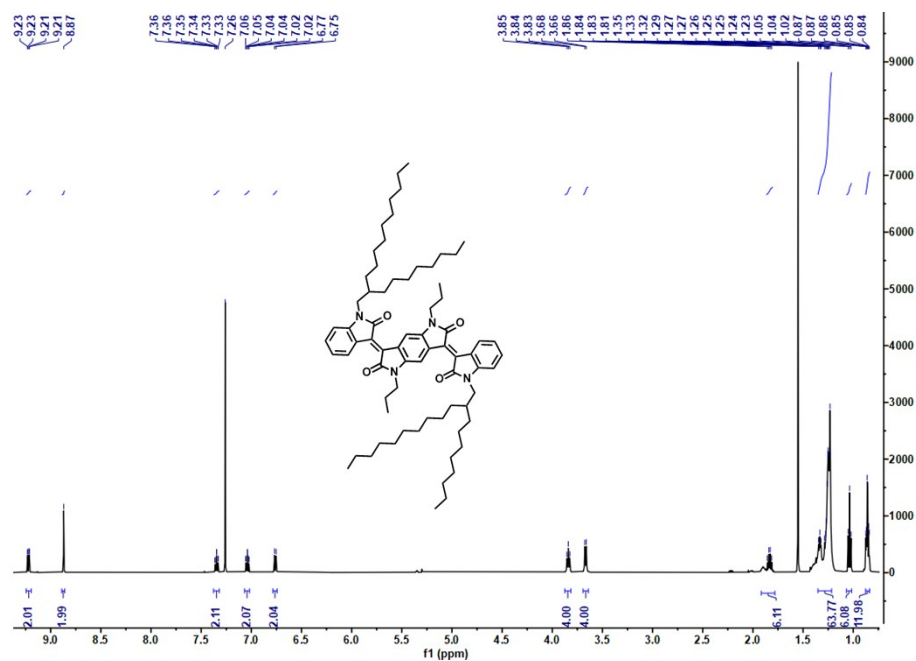

Figure S5.  $^1\text{H}$  NMR spectrum of compound 15.

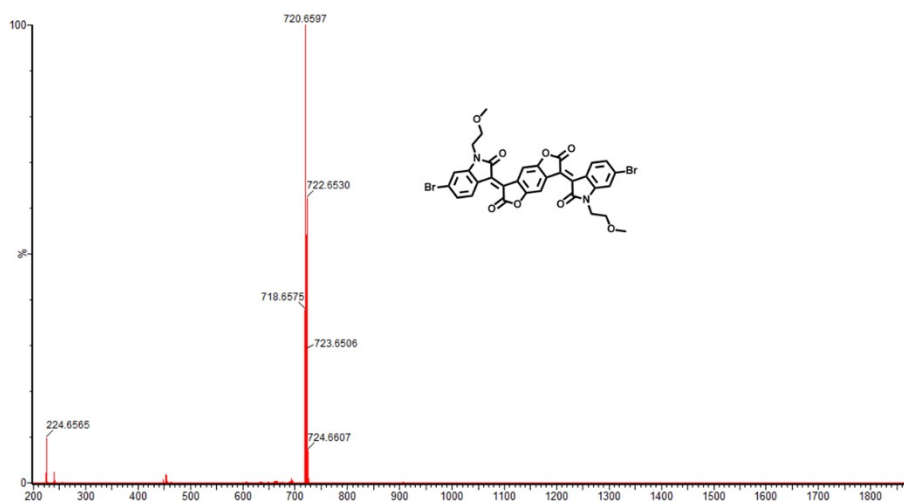

Figure S6. Mass spectrum of compound 11.

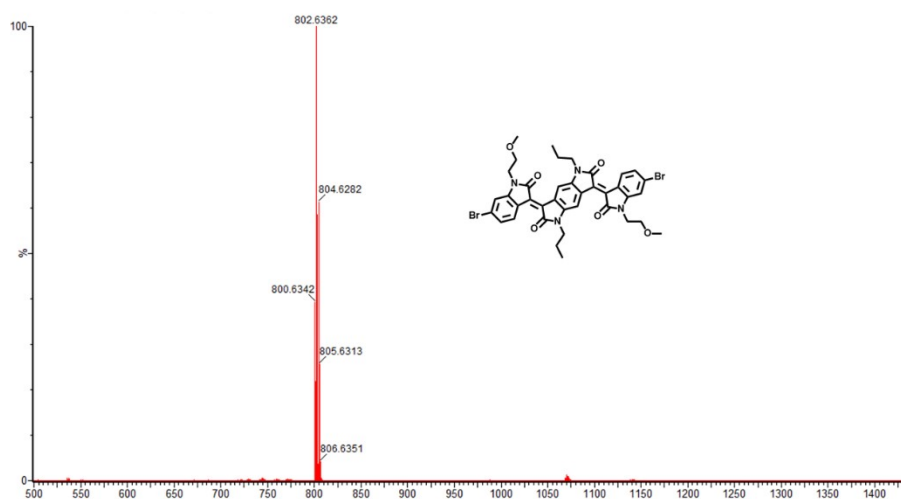

Figure S7. Mass spectrum of compound 12.

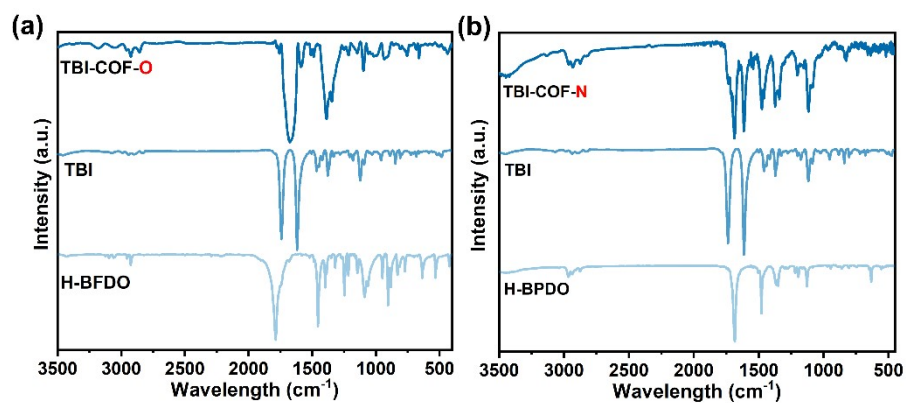

Figure S8. The FT-IR spectra of (a) **TBI-COF-O**, and (b) **TBI-COF-N**.

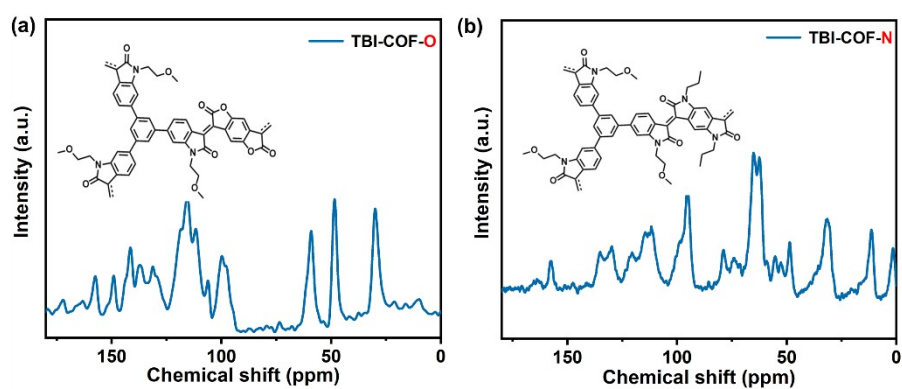

Figure S9. The solid-state  $^{13}\text{C}$  NMR of (a) **TBI-COF-O**, and (b) **TBI-COF-N**.

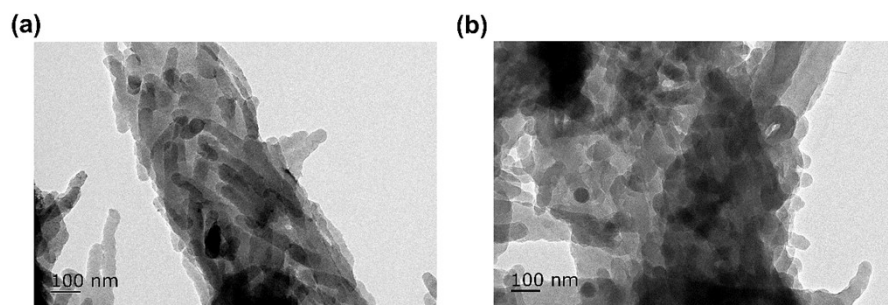

Figure S10. HR-TEM of (a) **TBI-COF-O**, and (b) **TBI-COF-N**.

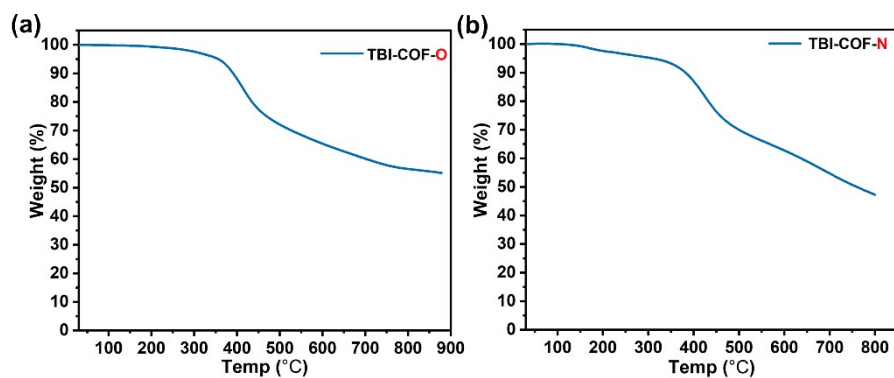

Figure S11. The thermogravimetric investigations of (a) TBI-COF-O, and (b) TBI-COF-N.

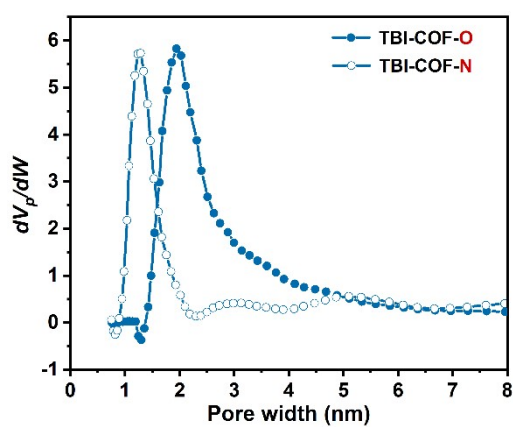

Figure S12. Pore size distribution profile of TBI-COF-O and TBI-COF-N.

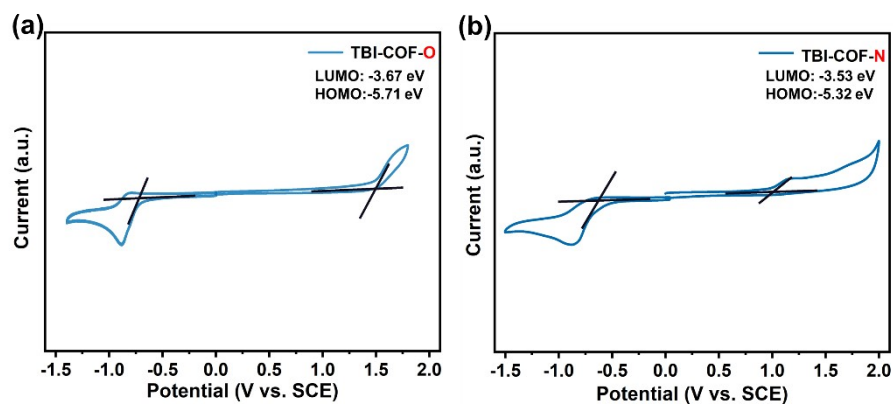

Figure S13. The electrochemical energy level of (a) TBI-COF-O, and (b) TBI-COF-N.

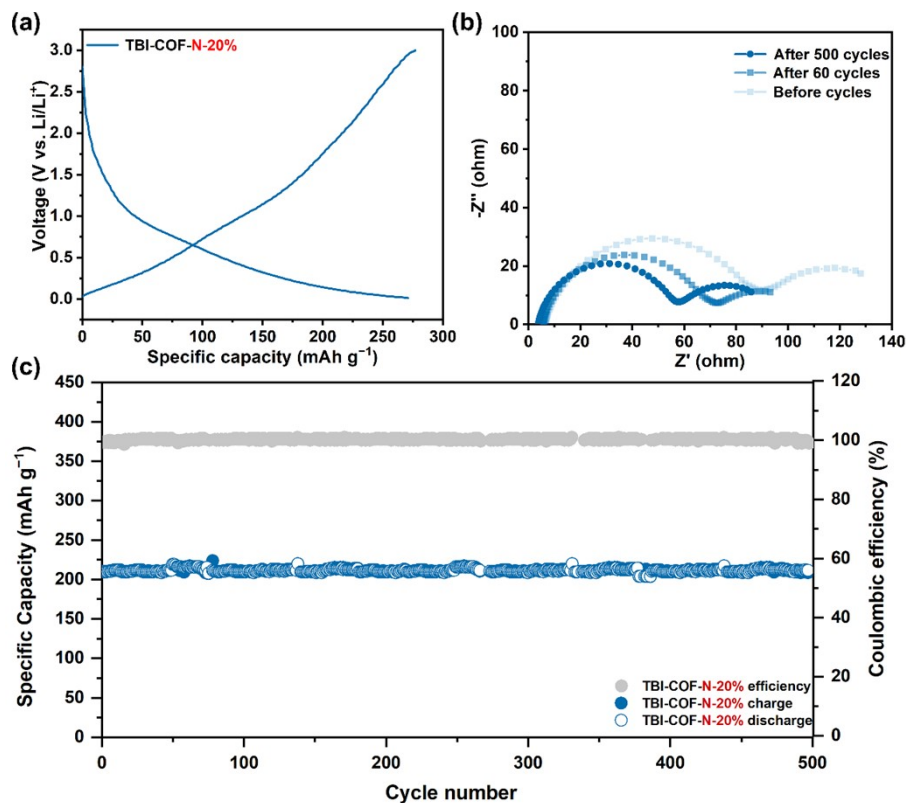

Figure S14. Lithium-ion battery performance with COF-based cathodes. (a) Specific capacity of **TBI-COF-N** with 20wt% conductive carbon at the rate of 0.1C; (b) Electrochemical impedance spectra of **TBI-COF-N** under different cycles. (c) Long-term cycling stability of **TBI-COF-N** cathodes at a discharge rate of 1C.

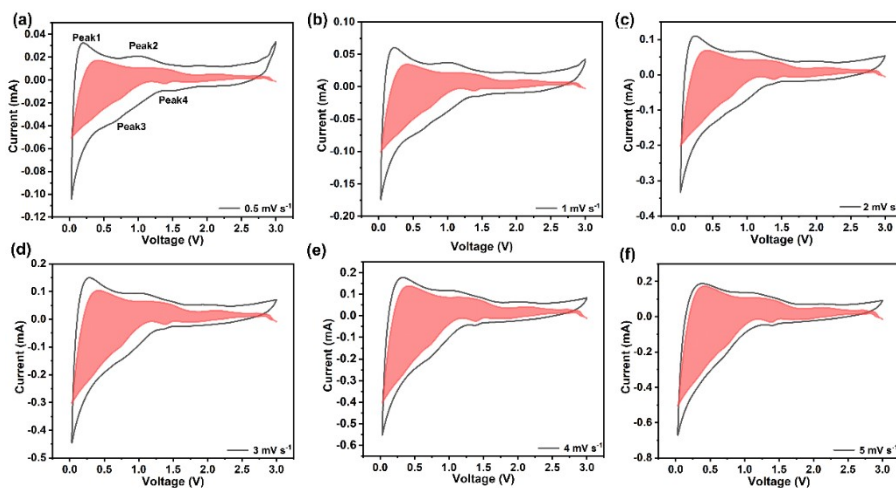

Figure S15. The cyclic voltammetry (CV) curves and the integral area of the origin region (red area) of **TBI-COF-O** under different scan rates, (a) 0.5 mV s<sup>-1</sup>, (b) 1 mV s<sup>-1</sup>, (c) 2 mV s<sup>-1</sup>, (d) 3 mV s<sup>-1</sup>, (e) 4 mV s<sup>-1</sup>, and (f) 5 mV s<sup>-1</sup>.

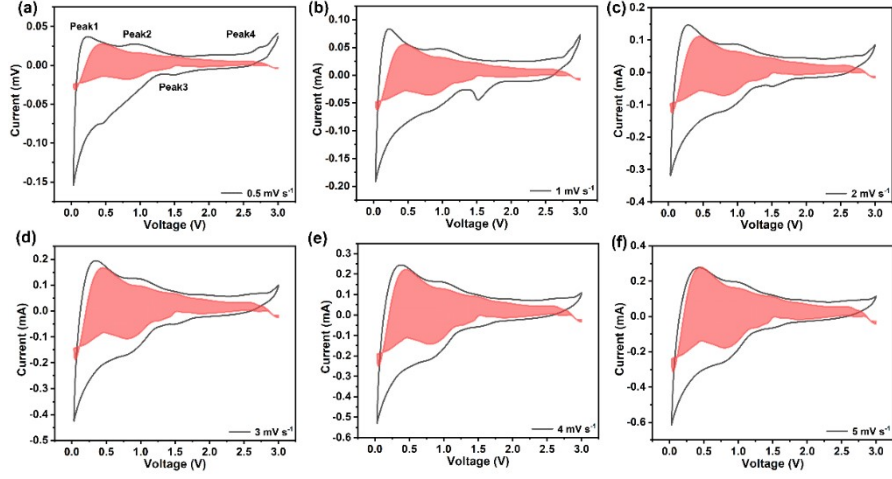

Figure S16. The cyclic voltammetry (CV) curves and the integral area of the origin region (red area) of **TBI-COF-N** under different scan rates, (a) 0.5  $\text{mV s}^{-1}$ , (b) 1  $\text{mV s}^{-1}$ , (c) 2  $\text{mV s}^{-1}$ , (d) 3  $\text{mV s}^{-1}$ , (e) 4  $\text{mV s}^{-1}$ , and (f) 5  $\text{mV s}^{-1}$ .

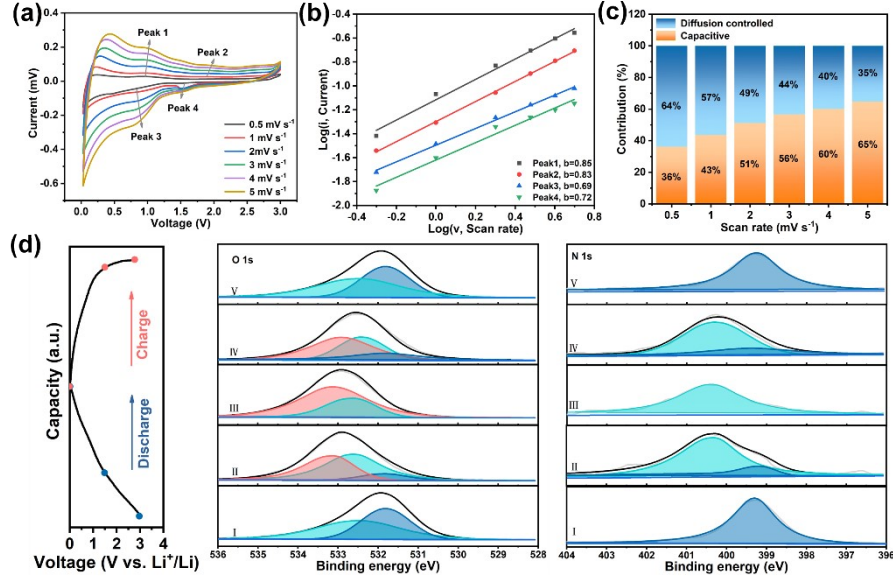

Figure S17. (a) The cyclic voltammetry (CV) curves of **TBI-COF-N** under different scan rates (0.5  $\text{mV s}^{-1}$ , 1  $\text{mV s}^{-1}$ , 2  $\text{mV s}^{-1}$ , 3  $\text{mV s}^{-1}$ , 4  $\text{mV s}^{-1}$ , and 5  $\text{mV s}^{-1}$ ); (b) Linear fits of the logarithms of the peak current against logarithms of scan rate for **TBI-COF-N**; (c) Normalized capacity contribution of the capacitive and diffusion-controlled process of the **TBI-COF-N**; (d) Ex-situ X-ray photoelectron spectroscopy energy spectra of **TBI-COF-N** corresponding to the charging and discharging behaviors of the battery, including O1s, and N1s.

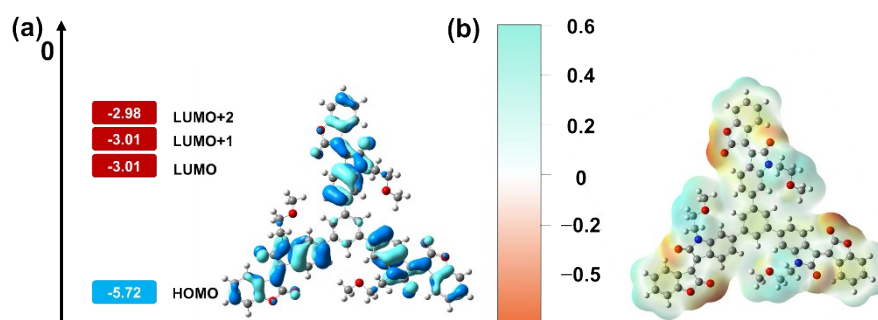

Figure S18. (a) Theoretical calculation results of **TBI-COF-O**; (b) Electrostatic potential map of **TBI-COF-O** (red color represents the preferred binding site for  $\text{Li}^+$ ).

## Section C. Supporting Tables

Table S1. Optimization of synthesis conditions for **TBI-COF-O**.

| Entry No. | Solvents         | Catalyst                           | Temperature (°C) | Crystallinity |
|-----------|------------------|------------------------------------|------------------|---------------|
| 1         | o-DCB/n-BuOH=1/1 | 2M Na <sub>2</sub> CO <sub>3</sub> | 120              | No            |
| 2         | o-DCB/n-BuOH=1/1 | 2M NaOH                            | 120              | No            |
| 3         | o-DCB/n-BuOH=1/1 | 2M KOH                             | 120              | No            |
| 4         | o-DCB/n-BuOH=1/1 | Pyridine                           | 120              | No            |
| 5         | o-DCB/n-BuOH=1/1 | Piperidine                         | 120              | No            |
| 6         | o-DCB/n-BuOH=1/1 | Et <sub>3</sub> N                  | 120              | No            |
| 7         | o-DCB/n-BuOH=1/1 | AcOH                               | 120              | No            |
| 8         | o-DCB/n-BuOH=1/1 | 6M AcOH                            | 120              | No            |
| 9         | o-DCB/n-BuOH=1/1 | 12M AcOH                           | 120              | No            |
| 10        | o-DCB/n-BuOH=1/1 | CF <sub>3</sub> SO <sub>3</sub> H  | 120              | No            |
| 11        | o-DCB/n-BuOH=1/1 | TsOH                               | 120              | No            |
| 12        | o-DCB/n-BuOH=1/1 | 2M TsOH                            | 120              | No            |
| 13        | o-DCB/n-BuOH=1/1 | 4M TsOH                            | 120              | No            |
| 14        | o-DCB/n-BuOH=1/1 | 6M TSOH                            | 120              | No            |
| 15        | Dioxane/Mes=1/1  | 2M Na <sub>2</sub> CO <sub>3</sub> | 120              | No            |
| 16        | Dioxane/Mes=1/1  | 2M NaOH                            | 120              | No            |
| 17        | Dioxane/Mes=1/1  | 2M KOH                             | 120              | No            |
| 18        | Dioxane/Mes=1/1  | Pyridine                           | 120              | No            |
| 19        | Dioxane/Mes=1/1  | Piperidine                         | 120              | No            |
| 20        | Dioxane/Mes=1/1  | Et <sub>3</sub> N                  | 120              | No            |
| 21        | Dioxane/Mes=1/1  | AcOH                               | 120              | No            |
| 22        | Dioxane/Mes=1/1  | 6M AcOH                            | 120              | No            |
| 23        | Dioxane/Mes=1/1  | 12M AcOH                           | 120              | No            |
| 24        | Dioxane/Mes=1/1  | CF <sub>3</sub> SO <sub>3</sub> H  | 120              | No            |
| 25        | Dioxane/Mes=1/1  | TsOH                               | 120              | No            |
| 26        | Dioxane/Mes=1/1  | 2M TsOH                            | 120              | No            |
| 27        | Dioxane/Mes=1/1  | 4M TsOH                            | 120              | No            |
| 28        | Dioxane/Mes=1/1  | 6M TSOH                            | 120              | No            |
| 29        | DMF/n-BuOH=1/1   | 2M Na <sub>2</sub> CO <sub>3</sub> | 120              | No            |
| 30        | DMF/n-BuOH=1/1   | 2M NaOH                            | 120              | No            |
| 31        | DMF/n-BuOH=1/1   | 2M KOH                             | 120              | No            |
| 32        | DMF/n-BuOH=1/1   | Pyridine                           | 120              | No            |
| 33        | DMF/n-BuOH=1/1   | Piperidine                         | 120              | No            |
| 34        | DMF/n-BuOH=1/1   | Et <sub>3</sub> N                  | 120              | No            |
| 35        | DMF/n-BuOH=1/1   | AcOH                               | 120              | No            |
| 36        | DMF/n-BuOH=1/1   | 6M AcOH                            | 120              | No            |
| 37        | DMF/n-BuOH=1/1   | 12M AcOH                           | 120              | No            |
| 38        | DMF/n-BuOH=1/1   | CF <sub>3</sub> SO <sub>3</sub> H  | 120              | No            |
| 39        | DMF/n-BuOH=1/1   | TsOH                               | 120              | No            |
| 40        | DMF/n-BuOH=1/1   | 2M TsOH                            | 120              | No            |
| 41        | DMF/n-BuOH=1/1   | 4M TsOH                            | 120              | No            |
| 42        | DMF/n-BuOH=1/1   | 6M TSOH                            | 120              | No            |
| 43        | DMAc/n-BuOH =1/1 | 2M Na <sub>2</sub> CO <sub>3</sub> | 120              | No            |
| 44        | DMAc/n-BuOH =1/1 | 2M NaOH                            | 120              | No            |
| 45        | DMAc/n-BuOH =1/1 | 2M KOH                             | 120              | No            |
| 46        | DMAc/n-BuOH =1/1 | Pyridine                           | 120              | No            |
| 47        | DMAc/n-BuOH =1/1 | Piperidine                         | 120              | No            |
| 48        | DMAc/n-BuOH =1/1 | Et <sub>3</sub> N                  | 120              | No            |
| 49        | DMAc/n-BuOH =1/1 | AcOH                               | 120              | No            |

|    |                      |                                   |     |      |
|----|----------------------|-----------------------------------|-----|------|
| 50 | DMAc/n-BuOH =1/1     | 6M AcOH                           | 120 | No   |
| 51 | DMAc/n-BuOH =1/1     | 12M AcOH                          | 120 | No   |
| 52 | DMAc/n-BuOH =1/1     | CF <sub>3</sub> SO <sub>3</sub> H | 120 | No   |
| 53 | DMAc/n-BuOH =1/1     | TsOH                              | 120 | No   |
| 54 | DMAc/n-BuOH =1/1     | 2M TsOH                           | 120 | No   |
| 55 | DMAc/n-BuOH =1/1     | 4M TsOH                           | 120 | No   |
| 56 | DMAc/n-BuOH =1/1     | 6M TSOH                           | 120 | No   |
| 57 | AcOH                 | 4M TsOH                           | 120 | Low  |
| 58 | AcOH/n-BuOH=1/1      | 4M TsOH                           | 120 | High |
| 59 | AcOH/isopropanol=1/1 | 4M TsOH                           | 120 | High |

Table S2. Optimization of synthesis conditions for **TBI-COF-N**.

| Entry No. | Solvents         | Catalyst                           | Temperature (°C) | Crystallinity |
|-----------|------------------|------------------------------------|------------------|---------------|
| 1         | o-DCB/n-BuOH=1/1 | 2M Na <sub>2</sub> CO <sub>3</sub> | 120              | No            |
| 2         | o-DCB/n-BuOH=1/1 | 2M NaOH                            | 120              | No            |
| 3         | o-DCB/n-BuOH=1/1 | 2M KOH                             | 120              | No            |
| 4         | o-DCB/n-BuOH=1/1 | Pyridine                           | 120              | No            |
| 5         | o-DCB/n-BuOH=1/1 | Piperidine                         | 120              | No            |
| 6         | o-DCB/n-BuOH=1/1 | Et <sub>3</sub> N                  | 120              | No            |
| 7         | o-DCB/n-BuOH=1/1 | AcOH                               | 120              | No            |
| 8         | o-DCB/n-BuOH=1/1 | 6M AcOH                            | 120              | No            |
| 9         | o-DCB/n-BuOH=1/1 | 12M AcOH                           | 120              | No            |
| 10        | o-DCB/n-BuOH=1/1 | CF <sub>3</sub> SO <sub>3</sub> H  | 120              | No            |
| 11        | o-DCB/n-BuOH=1/1 | TsOH                               | 120              | No            |
| 12        | o-DCB/n-BuOH=1/1 | 2M TsOH                            | 120              | No            |
| 13        | o-DCB/n-BuOH=1/1 | 4M TsOH                            | 120              | No            |
| 14        | o-DCB/n-BuOH=1/1 | 6M TSOH                            | 120              | No            |
| 15        | Dioxane/Mes=1/1  | 2M Na <sub>2</sub> CO <sub>3</sub> | 120              | No            |
| 16        | Dioxane/Mes=1/1  | 2M NaOH                            | 120              | No            |
| 17        | Dioxane/Mes=1/1  | 2M KOH                             | 120              | No            |
| 18        | Dioxane/Mes=1/1  | Pyridine                           | 120              | No            |
| 19        | Dioxane/Mes=1/1  | Piperidine                         | 120              | No            |
| 20        | Dioxane/Mes=1/1  | Et <sub>3</sub> N                  | 120              | No            |
| 21        | Dioxane/Mes=1/1  | AcOH                               | 120              | No            |
| 22        | Dioxane/Mes=1/1  | 6M AcOH                            | 120              | No            |
| 23        | Dioxane/Mes=1/1  | 12M AcOH                           | 120              | No            |
| 24        | Dioxane/Mes=1/1  | CF <sub>3</sub> SO <sub>3</sub> H  | 120              | No            |
| 25        | Dioxane/Mes=1/1  | TsOH                               | 120              | No            |
| 26        | Dioxane/Mes=1/1  | 2M TsOH                            | 120              | No            |
| 27        | Dioxane/Mes=1/1  | 4M TsOH                            | 120              | No            |
| 28        | Dioxane/Mes=1/1  | 6M TSOH                            | 120              | No            |
| 29        | DMF/n-BuOH=1/1   | 2M Na <sub>2</sub> CO <sub>3</sub> | 120              | No            |
| 30        | DMF/n-BuOH=1/1   | 2M NaOH                            | 120              | No            |
| 31        | DMF/n-BuOH=1/1   | 2M KOH                             | 120              | No            |
| 32        | DMF/n-BuOH=1/1   | Pyridine                           | 120              | No            |
| 33        | DMF/n-BuOH=1/1   | Piperidine                         | 120              | No            |
| 34        | DMF/n-BuOH=1/1   | Et <sub>3</sub> N                  | 120              | No            |
| 35        | DMF/n-BuOH=1/1   | AcOH                               | 120              | No            |
| 36        | DMF/n-BuOH=1/1   | 6M AcOH                            | 120              | No            |
| 37        | DMF/n-BuOH=1/1   | 12M AcOH                           | 120              | No            |
| 38        | DMF/n-BuOH=1/1   | CF <sub>3</sub> SO <sub>3</sub> H  | 120              | No            |
| 39        | DMF/n-BuOH=1/1   | TsOH                               | 120              | No            |
| 40        | DMF/n-BuOH=1/1   | 2M TsOH                            | 120              | No            |
| 41        | DMF/n-BuOH=1/1   | 4M TsOH                            | 120              | No            |
| 42        | DMF/n-BuOH=1/1   | 6M TSOH                            | 120              | No            |

|    |                      |                                    |     |          |
|----|----------------------|------------------------------------|-----|----------|
| 43 | DMAC/n-BuOH =1/1     | 2M Na <sub>2</sub> CO <sub>3</sub> | 120 | No       |
| 44 | DMAC/n-BuOH =1/1     | 2M NaOH                            | 120 | No       |
| 45 | DMAC/n-BuOH =1/1     | 2M KOH                             | 120 | No       |
| 46 | DMAC/n-BuOH =1/1     | Pyridine                           | 120 | No       |
| 47 | DMAC/n-BuOH =1/1     | Piperidine                         | 120 | No       |
| 48 | DMAC/n-BuOH =1/1     | Et <sub>3</sub> N                  | 120 | No       |
| 49 | DMAC/n-BuOH =1/1     | AcOH                               | 120 | No       |
| 50 | DMAC/n-BuOH =1/1     | 6M AcOH                            | 120 | No       |
| 51 | DMAC/n-BuOH =1/1     | 12M AcOH                           | 120 | No       |
| 52 | DMAC/n-BuOH =1/1     | CF <sub>3</sub> SO <sub>3</sub> H  | 120 | No       |
| 53 | DMAC/n-BuOH =1/1     | TsOH                               | 120 | No       |
| 54 | DMAC/n-BuOH =1/1     | 2M TsOH                            | 120 | No       |
| 55 | DMAC/n-BuOH =1/1     | 4M TsOH                            | 120 | No       |
| 56 | DMAC/n-BuOH =1/1     | 6M TSOH                            | 120 | No       |
| 57 | AcOH                 | 4M TsOH                            | 120 | Low      |
| 58 | AcOH/n-BuOH=1/1      | 4M TsOH                            | 120 | Low      |
| 59 | AcOH/isopropanol=1/1 | 4M TsOH                            | 120 | Low      |
| 60 | AcOH                 | 4M TsOH                            | 140 | Moderate |
| 61 | AcOH/n-BuOH=1/1      | 4M TsOH                            | 140 | High     |
| 62 | AcOH/isopropanol=1/1 | 4M TsOH                            | 140 | High     |

Table S3. Comparison of conductivity and carrier mobility between Janus dione based COFs and other conductive COFs.

| COFs                       | Sample type | Methods     | $\sigma/S\text{ cm}^{-1}$   | Refs      |
|----------------------------|-------------|-------------|-----------------------------|-----------|
| NIPc-NH-CoPcF <sub>8</sub> | Film        | 4-probe     | $1.3 \times 10^{-1}$        | S4        |
| TFPPy-ICTO-COF             | Pellet      | 4-probe     | $5.6 \times 10^{-3}$        | S5        |
| TFPPer-ICTO-COF            | Pellet      | 4-probe     | $2.3 \times 10^{-3}$        | S5        |
| TBI-COF-O                  | Pellet      | 4-probe     | $7.5 \times 10^{-4}$        | This work |
| Sp <sup>2</sup> -c-COF     | Pellet      | 2-probe     | $7.1 \times 10^{-4}$ (dope) | S6        |
| ZnPc-pz-I <sub>2</sub>     | Pellet      | Hall effect | $3.1 \times 10^{-4}$        | S7        |
| CoPc-PDQ-COF               | Pellet      | 4-probe     | $3.6 \times 10^{-5}$        | S8        |
| COF-DC-8                   | Pellet      | 4-probe     | $2.5 \times 10^{-5}$        | S9        |
| TBI-COF-N                  | Pellet      | 4-probe     | $2.3 \times 10^{-5}$        | This work |
| TANG-COF                   | Pellet      | 4-probe     | $1 \times 10^{-2}$ (dope)   | S10       |
| TFF-COF                    | Pellet      | 2-probe     | $2.1 \times 10^{-7}$        | S11       |
| TTF-Por(Co)-COF            | Pellet      | 2-probe     | $1.3 \times 10^{-7}$        | S12       |
| TAPP-TFPP-COF              | Pellet      | 2-probe     | $1.4 \times 10^{-9}$        | S13       |

Table S4. Performance comparison between representative COF-based, metal oxides and organic small molecule materials for LIBs.

| Electrode       | Low-rate capacity                                 | High-rate capacity                              | Ref       |
|-----------------|---------------------------------------------------|-------------------------------------------------|-----------|
| TBI-COF-O       | 320 mAh g <sup>-1</sup> at 0.1C                   | 245 mAh g <sup>-1</sup> at 1C                   | This work |
| PT-COF50        | 267 mAh g <sup>-1</sup> at 0.2 A g <sup>-1</sup>  | 229 mAh g <sup>-1</sup> at 5 A g <sup>-1</sup>  | S14       |
| BTT-ICTO@CNT-50 | 396 mAh g <sup>-1</sup> at 0.1 A g <sup>-1</sup>  | 227 mAh g <sup>-1</sup> at 5 A g <sup>-1</sup>  | S33       |
| HATN-AQ-COF     | 319 mAh g <sup>-1</sup> at 0.18 A g <sup>-1</sup> | 227 mAh g <sup>-1</sup> at 3.6A g <sup>-1</sup> | S15       |
| TFPPy-ICTO-COF  | 338 mAh g <sup>-1</sup> at 0.1 A g <sup>-1</sup>  | 214 mAh g <sup>-1</sup> at 1 A g <sup>-1</sup>  | S5        |
| TBI-COF-N       | 265 mAh g <sup>-1</sup> at 0.1C                   | 204 mAh g <sup>-1</sup> at 1C                   | This work |
| PIBN-G          | 271 mAh g <sup>-1</sup> at 0.1C                   | 193 mAh g <sup>-1</sup> at 10C                  | S16       |
| USTB-6@G        | 253 mAh g <sup>-1</sup> at 0.1C                   | 188 mAh g <sup>-1</sup> at 10C                  | S34       |
| PFG-1@rGO       | 480 mAh g <sup>-1</sup> at 0.5 A g <sup>-1</sup>  | 189 mAh g <sup>-1</sup> at 5 A g <sup>-1</sup>  | S35       |
| TFPPer-ICTO-COF | 303 mAh g <sup>-1</sup> at 0.1 A g <sup>-1</sup>  | 182 mAh g <sup>-1</sup> at 1 A g <sup>-1</sup>  | S5        |
| PT-COF-30       | 280 mAh g <sup>-1</sup> at 0.2 A g <sup>-1</sup>  | 145 mAh g <sup>-1</sup> at 5 A g <sup>-1</sup>  | S14       |
| COF-TRO         | 268 mAh g <sup>-1</sup> at 0.1C                   | 124 mAh g <sup>-1</sup> at 1C                   | S17       |
| PT-COF10        | 225 mAh g <sup>-1</sup> at 0.2 A g <sup>-1</sup>  | 115 mAh g <sup>-1</sup> at 5 A g <sup>-1</sup>  | S14       |
| BTT-ICTO@CNT-30 | 326 mAh g <sup>-1</sup> at 0.1 A g <sup>-1</sup>  | 113 mAh g <sup>-1</sup> at 5 A g <sup>-1</sup>  | S33       |
| 2D CCP-HATN     | 116 mAh g <sup>-1</sup> at 0.1 A g <sup>-1</sup>  | 94 mAh g <sup>-1</sup> at 0.1 A g <sup>-1</sup> | S18       |

|                                                       |                                                     |                                                   |     |
|-------------------------------------------------------|-----------------------------------------------------|---------------------------------------------------|-----|
| PT-COF                                                | 193 mAh g <sup>-1</sup> at 0.2 A g <sup>-1</sup>    | 76 mAh g <sup>-1</sup> at 5 A g <sup>-1</sup>     | S14 |
| BTT-ICTO@CNT-10                                       | 269 mAh g <sup>-1</sup> at 0.1 A g <sup>-1</sup>    | 67 mAh g <sup>-1</sup> at 5 A g <sup>-1</sup>     | S33 |
| BTT-ICTO                                              | 225 mAh g <sup>-1</sup> at 0.1 A g <sup>-1</sup>    | 65 mAh g <sup>-1</sup> at 1 A g <sup>-1</sup>     | S33 |
| DAPH-TFPI-COF                                         | 80 mAh g <sup>-1</sup> at 0.5C                      | 50 mAh g <sup>-1</sup> at 20C                     | S19 |
| DAAQ-TFP-COF                                          | 110 mAh g <sup>-1</sup> at 0.02 A g <sup>-1</sup>   | 25 mAh g <sup>-1</sup> and at 3 A g <sup>-1</sup> | S20 |
| 2D-PAI@CNT                                            | 104.4 mAh g <sup>-1</sup> at 0.1 A g <sup>-1</sup>  | 96 mAh g <sup>-1</sup> at 2 A g <sup>-1</sup>     | S21 |
| PI-COF@rGO                                            | 112 mAh g <sup>-1</sup> at 0.1C                     | 67 mAh g <sup>-1</sup> at 1C                      | S22 |
| E-TP-COF                                              | 110 mAh g <sup>-1</sup> at 0.2 A g <sup>-1</sup>    | 30 mAh g <sup>-1</sup> at 2 A g <sup>-1</sup>     | S23 |
| NBALs                                                 | 155 mAh g <sup>-1</sup> at 0.5C                     | 50 mAh g <sup>-1</sup> at 20C                     | S24 |
| C8Q                                                   | 341 mAh g <sup>-1</sup> at 0.2C                     | 60 mAh g <sup>-1</sup> at 5C                      | S25 |
| PTN                                                   | 119.1 mAh g <sup>-1</sup> at 0.05 A g <sup>-1</sup> | 89.4 mAh g <sup>-1</sup> at 5 A g <sup>-1</sup>   | S26 |
| p-DNB                                                 | 536 mAh g <sup>-1</sup> at 0.05 A g <sup>-1</sup>   | 250 mAh g <sup>-1</sup> at 0.2 A g <sup>-1</sup>  | S27 |
| 1,5-DNN                                               | Irreversible                                        | Irreversible                                      | S28 |
| Li <sub>1.075</sub> V <sub>0.925</sub> O <sub>2</sub> | 314 mAh g <sup>-1</sup> at 0.1C                     | 172 mAh g <sup>-1</sup> at 5C                     | S29 |
| Li <sub>0.78</sub> V <sub>0.75</sub> O <sub>2</sub>   | 551.6 mAh g <sup>-1</sup> at 0.1 A g <sup>-1</sup>  | 272 mAh g <sup>-1</sup> at 1 A g <sup>-1</sup>    | S30 |
| Li <sub>1.2</sub> VO <sub>2</sub>                     | 294 mAh g <sup>-1</sup> at 0.1C                     | -                                                 | S31 |
| Li <sub>1.07</sub> V <sub>0.93</sub> O <sub>2</sub>   | 116 mAh g <sup>-1</sup> at 0.1C                     | -                                                 | S32 |

## Section D. Supporting References.

- S1. E. Papajak, J. Zheng, X. Xu, H. R. Leverentz, D. G. Truhlar, *J. Chem. Theory Comput.*, 2011, **7**, 3027–3034.
- S2. S. Grimme, J. Antony, S. Ehrlich, H. Krieg, *J. Chem. Phys.*, 2010, **132**, 154104–154122.
- S3. S. S. Xantheas, *J. Chem. Phys.*, 1996, **104**, 8821–8824.
- S4. Y. Yue, P. Cai, X. Xu, H. Li, H. Chen, H. C. Zhou, N. Huang, *Angew. Chem. Int. Ed.*, 2021, **60**, 10806–10813.
- S5. X. Xu, S. Zhang, K. Xu, H. Chen, X. Fan, N. Huang, *J. Am. Chem. Soc.*, 2023, **145**, 1022–1030.
- S6. E. Jin, M. Asada, Q. Xu, S. Dalapati, M. A. Addicoat, M. A. Brady, H. Xu, T. Nakamura, T. Heine, Q. Chen, D. Jiang, *Science*, 2017, **357**, 673–676.
- S7. M. Wang, M. Wang, H. H. Lin, M. Ballabio, H. Zhong, M. Bonn, S. Zhou, T. Heine, E. Canovas, R. Dong, X. Feng, *J. Am. Chem. Soc.*, 2020, **142**, 21622–21627.
- S8. N. Huang, K. H. Lee, Y. Yue, X. Xu, S. Irle, Q. Jiang, D. Jiang, *Angew. Chem. Int. Ed.*, 2020, **59**, 16587–16593.
- S9. Z. Meng, R. M. Stolz, K. A. Mirica, *J. Am. Chem. Soc.*, 2019, **141**, 11929–11937.
- S10. V. Lakshmi, C. H. Liu, M. Rajeswara Rao, Y. Chen, Y. Fang, A. Dadvand, E. Hamzehpoor, Y. Sakai-Otsuka, R. S. Stein, D. F. Perepichka, *J. Am. Chem. Soc.*, 2020, **142**, 2155–2160.
- S11. S. L. Cai, Y. B. Zhang, A. B. Pun, B. He, J. Yang, F. M. Toma, I. D. Sharp, O. M. Yaghi, J. Fan, S. R. Zheng, W. G. Zhang, Y. Liu, *Chem. Sci.*, 2014, **5**, 4693–4700.
- S12. S. Jin, T. Sakurai, T. Kowalczyk, S. Dalapati, F. Xu, H. Wei, X. Chen, J. Gao, S. Seki, S. Irle, D. Jiang, *Chem. Eur. J.*, 2014, **20**, 14608–14613.
- S13. X. Xu, S. Wang, Y. Yue, N. Huang, *ACS Appl. Mater. Interfaces*, 2020, **12**, 37427–37434.
- S14. H. Gao, A. R. Neale, Q. Zhu, M. Bahri, X. Wang, H. Yang, Y. Xu, R. Clowes, N. D. Browning, M. A. Little, L. J. Hardwick, A. I. Cooper, *J. Am. Chem. Soc.*, 2022, **144**, 9434–9442.
- S15. X. Yang, L. Gong, X. Liu, P. Zhang, B. Li, D. Qi, K. Wang, F. He, J. Jiang, *Angew. Chem. Int. Ed.*, 2022, **61**, e202207043.
- S16. Z. Luo, L. Liu, J. Ning, K. Lei, Y. Lu, F. Li, J. Chen, *Angew. Chem. Int. Ed.*, 2018, **57**, 9443–9446.
- S17. X. Yang, Y. Hu, N. Dunlap, X. Wang, S. Huang, Z. Su, S. Sharma, Y. Jin, F. Huang, X. Wang, S. H. Lee, W. Zhang, *Angew. Chem. Int. Ed.*, 2020, **59**, 20385–20389.
- S18. S. Xu, G. Wang, B. P. Biswal, M. Addicoat, S. Paasch, W. Sheng, X. Zhuang, E. Brunner, T. Heine, R. Berger, X. Feng, *Angew. Chem. Int. Ed.*, 2019, **58**, 849–853.
- S19. E. Vitaku, C. N. Gannett, K. L. Carpenter, L. Shen, H. D. Abruna, W. R. Dichtel, *J. Am. Chem. Soc.*, 2020, **142**, 16–20.
- S20. S. Wang, Q. Wang, P. Shao, Y. Han, X. Gao, L. Ma, S. Yuan, X. Ma, J. Zhou, X. Feng, B. Wang, *J. Am. Chem. Soc.*, 2017, **139**, 4258–4261.
- S21. G. Wang, N. Chandrasekhar, B. P. Biswal, D. Becker, S. Paasch, E. Brunner, M. Addicoat, M. Yu, R. Berger, X. Feng, *Adv. Mater.*, 2019, **31**, 1901478.
- S22. Z. Wang, Y. Li, P. Liu, Q. Qi, F. Zhang, G. Lu, X. Zhao, X. Huang, *Nanoscale*, 2019, **11**, 5330–5335.
- S23. G. F. Zhao, H. N. Li, Z. H. Gao, L. F. Xu, Z. Y. Mei, S. Cai, T. T. Liu, X. F. Yang, H. Guo, X. L. Sun, *Adv. Funct. Mater.*, 2021, **31**, 2101019.
- S24. C. Luo, X. Ji, S. Hou, N. Eidson, X. Fan, Y. Liang, T. Deng, J. Jiang, C. Wang, *Adv. Mater.*, 2018, **30**, 1706498.
- S25. W. Huang, S. Liu, C. Li, Y. Lin, P. Hu, Z. Sun, Q. Zhang, *EcoMat*, 2022, **4**, e12214.

- S26. J. Wang, H. Liu, C. Du, X. Zhang, Y. Liu, H. Yao, Z. Sun, S. Guan, *Chem. Eng. J.*, 2022, **444**, 136598.
- S27. X. Liu, Z. Ye, *Adv. Energy Mater.*, 2021, **11**, 2003281.
- S28. Z. F. Chen, H. Su, P. F. Sun, P. X. Bai, J. X. Yang, M. J. Li, Y. F. Deng, Y. Liu, Y. H. Geng, Y. H. Xu, *Proc. Natl. Acad. Sci. U.S.A.*, 2022, **119**, e2116775119.
- S29. W. Kim, T. Y. U. Jeong, H. C. Choi, Y. J. Kim, J. H. Song, H. Lee, Y. J. J. Lee, *J. Appl. Electrochem.*, 2011, **41**, 803–808.
- S30. W. Q. Zhang, J. J. Luo, X. N. Li, J. W. Liang, Y. C. Zhu, Y. T. Qian, *J. Mater. Chem. A*, 2017, **5**, 5148–5155.
- S31. J. H. Song, H. J. Park, K. J. Kim, Y. N. Jo, J. S. Kim, Y. U. Jeong, Y. J. Kim, *J. Power Sources*, 2010, **195**, 6157–6161.
- S32. A. Armstrong, R. C. Lyness, P. M. Panchmatia, M. S. Islam, P. G. Bruce, *Nat. Mater.*, 2011, **10**, 223–229.
- S33. N. Fu, Y. Liu, K. Kang, X. Tang, S. Q. Zhang, Z. L. Yang, Y. Wang, P. J. Jin, Y. S. Niu, B. Yang, *Angew. Chem. Int. Ed.*, 2024, e202412334.
- S34. X. Liu, Y. Jin, H. Wang, X. Yang, P. Zhang, K. Wang, J. Jiang, *Adv. Mater.*, 2022, **34**, 2203605.
- S35. X. Li, H. Wang, H. Chen, Q. Zheng, Q. Zhang, H. Mao, Y. Liu, S. Cai, B. Sun, C. Dun, M. P. Gordon, H. Zheng, J. A. Reimer, J. J. Urban, J. Ciston, T. Tan, E. M. Chan, J. Zhang, Y. Liu, *Chem*, 2020, **6**, 933–944.
